# Supplementary material for: Electroless galvanic inks on inorganic WO3/Al boards
Source: Royal Society of Chemistry journal article supplement (doi:10.1039/c1cc12993g), 2011-01-01
Supplement: c1cc12993g.pdf [file c1cc12993g.pdf]

## Electric supplementary information (ESI)

### Electroless Galvanic Incs on Inorganic WO<sub>3</sub>/Al Boards

Masahiro Miyauchi,<sup>\*a</sup> Yue Li,<sup>b</sup> Shunsuke Yanai,<sup>c</sup> and Kazuya Yotsugi<sup>c</sup>

a Tokyo Institute of Technology. E-mail: mmiyauchi@ceram.titech.ac.jp

b Chinese Academy of Sciences.

c Sekisuijushi Technical Research Corporation.

\*Corresponding author: mmiyauchi@ceram.titech.ac.jp

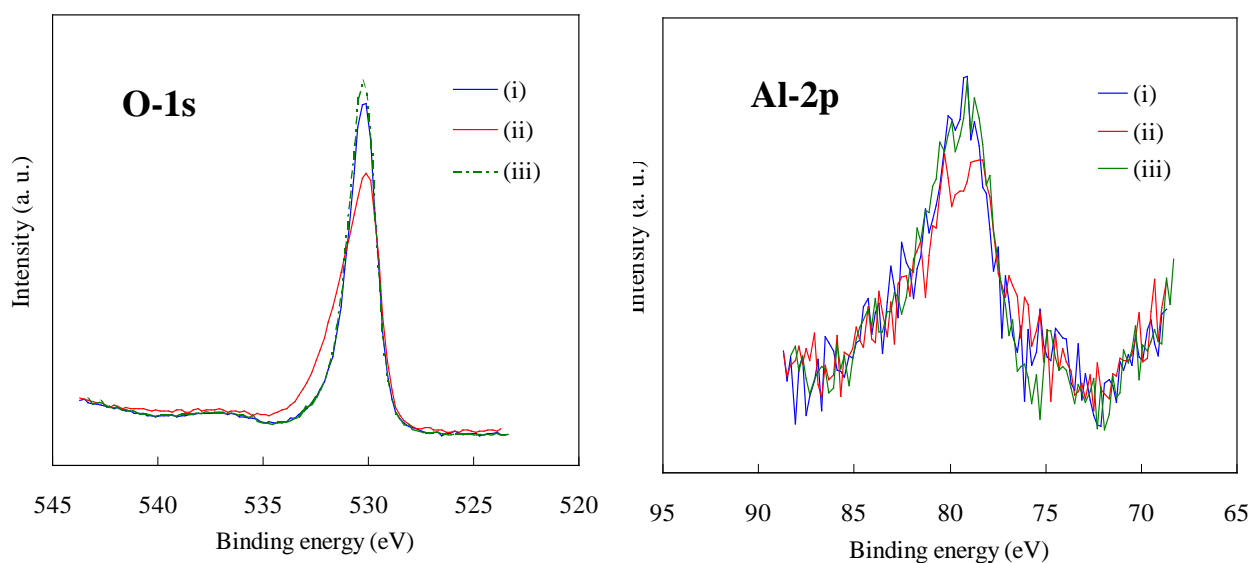

**Fig. S1** XPS for O-1s and Al-2p orbitals. (i) before treatment, (ii) after dipping in an aqueous HCl solution with a pH of 3.0 for 5 min, (iii) after exposure to air at 120 °C for 30 min. .

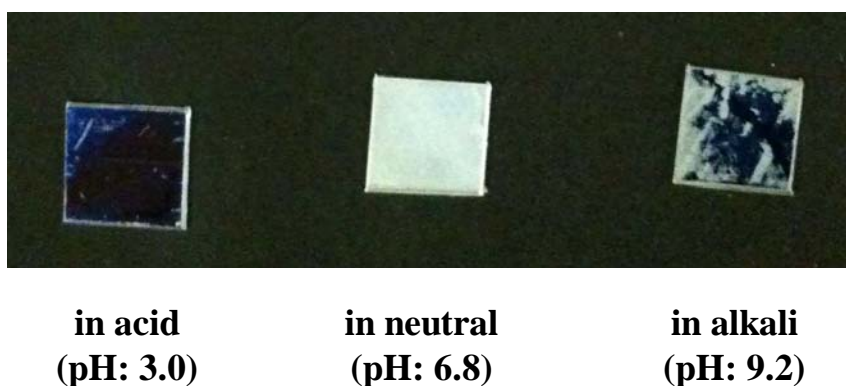

**Fig. S2** Photographs of WO<sub>3</sub>/Al samples after dipping in aqueous solutions with varying pH values.

Although WO<sub>3</sub>/Al also turns blue in an alkali solution, the color change is not as homogeneous as that after the acid treatment. Moreover, the color change was insignificant after dipping WO<sub>3</sub>/Al into a neutral aqueous solution.

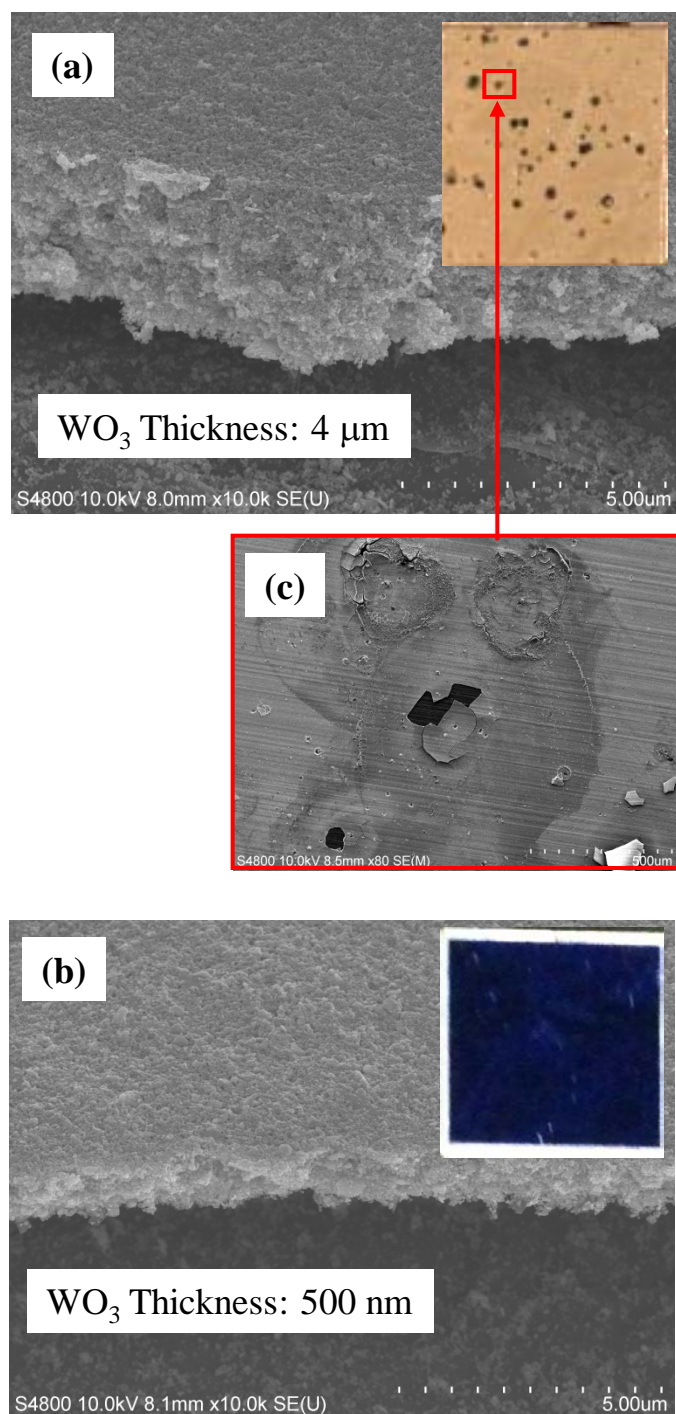

**Fig. S3** SEM images for  $\text{WO}_3/\text{Al}$  samples with  $\text{WO}_3$  thicknesses of  $4\ \mu\text{m}$  (a) and  $500\ \text{nm}$  (b). Insets in (a) and (b) are photographs of  $\text{WO}_3/\text{Al}$ . (c) SEM image at the blue spot in Fig. S3 (a).

Blue color appears only around the pinholes of  $\text{WO}_3$  film with a thickness of  $4\ \mu\text{m}$ .

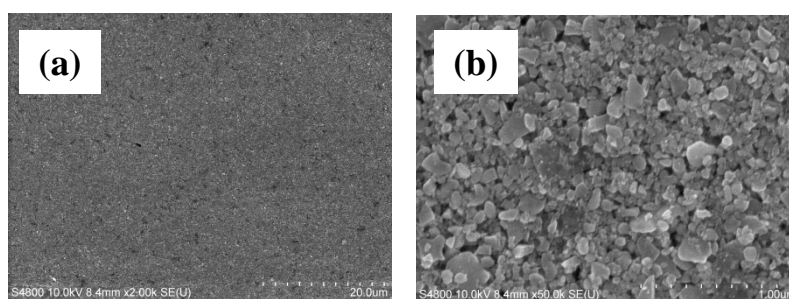

Initial  $\text{WO}_3/\text{Al}$

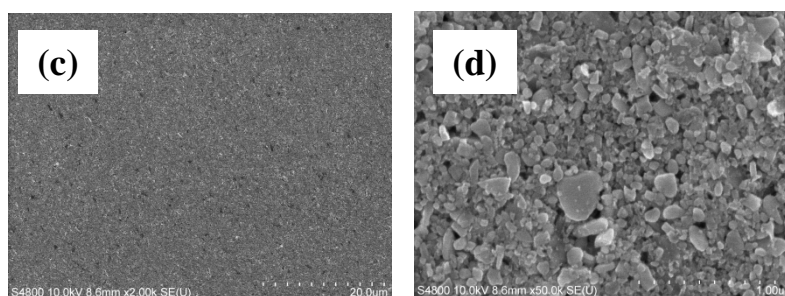

After 5 times repeated coloration and decoloration

**Fig. S4** SEM images for  $\text{WO}_3/\text{Al}$  samples. (a) and (b) are before coloration (initial state), (c) and (d) are after repeating the coloration and decoloration processes five time.

Morphology of  $\text{WO}_3$  does not change after repeating these processes.

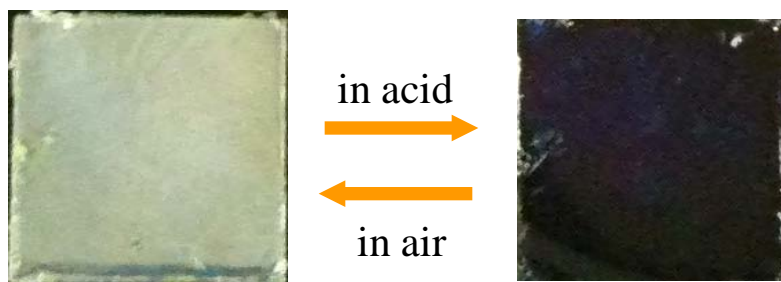

(a) Polycrystalline  $\text{WO}_3$  coated on Al foil

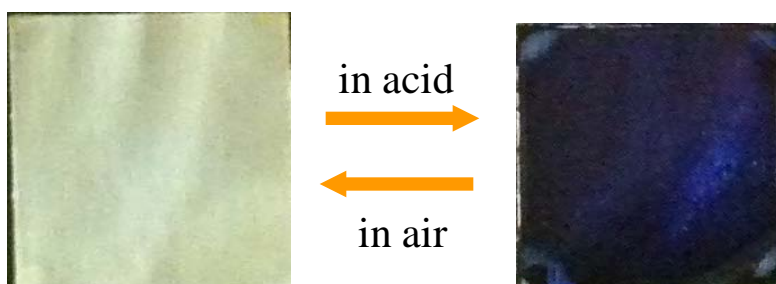

(b) Polycrystalline  $\text{WO}_3$  coated on Al coated glass substrate  
(Al was deposited on glass substrate by sputtering)

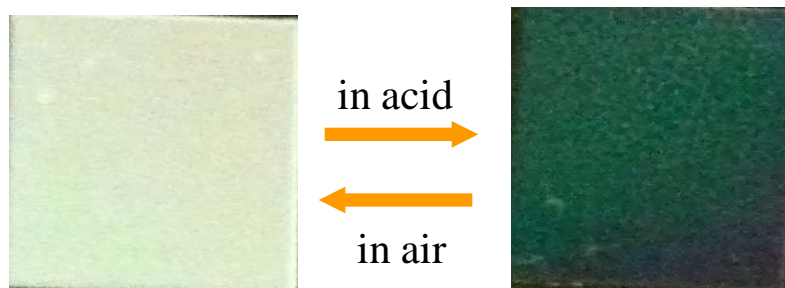

(c) Amorphous  $\text{WO}_3$  coated on Al plate by pulsed layer deposition method.

**Fig. S5** Photographs of various  $\text{WO}_3/\text{Al}$  structures. We confirmed that chromic devices can also be constructed by sputtering an Al foil or Al-coated glass substrate. Additionally, we found that similar to  $\text{WO}_3$  crystals, amorphous  $\text{WO}_3$  also exhibits an efficient color change.
